# Supplementary material for: Are the so-called low penetrance breast cancer genes, ATM, BRIP1, PALB2 and CHEK2, high risk for women with strong family histories?
Source: Springer Nature journal article supplement (doi:10.1186/bcr2099), 2008-06-01
Supplement: Additional file 1 [file bcr2099-s1.doc]

**Appendix**

Our calculations regarding sibling risk ratios were based on a logistic model for lifetime risk of breast cancer:

Pr(Cancer)=Pr(D|G,X)= g(α + βG + γX), where g(x)=ex/(1+ ex).

Here G represents the presence of a known risk factor (or more generally a vector of risk factors), while X is proportional to the unknown number of modest risk polymorphisms, or the polygenic risk. In reality we would expect risk polymorphisms to confer a spectrum of risks, however this situation can be adequately approximated by assuming all have equal risk since none are measured. Conceptually, a single allele of slightly higher risk might be represented by 2 or 3 virtual risk alleles. It is also convenient to reference the expected (population average) number of risk alleles, so that X is the deviation from the average and can be either positive or negative.

Using the standard normal approximation to the hypergeometric distribution, Mendelian evolution is reasonably approximated by taking the polygenic risks for a pair of first degree relatives to be the pair of correlated standard normal random variables X1 and X2, with correlation 0.5.

The population risk under this model can then be calculated by integrating Pr(D|G,X) over X and summing over G, with appropriate probability weights. Similarly, the probability of any pair of disease outcomes in two relatives can be calculated by performing a double integral over X1 and X2, with or without summation over the measurable genotypes G1 and G2 depending on whether these are known.

Suppressing the G1 and G2 for clarity,

Here N is the standard normal distribution function, on either one variable or two with correlation ρ.

Calculating first the population risk, followed by the risk conditional on an affected first degree relative, allowed us to calculate the familial risk ratio for any given combination of per-allele odds-ratio and allele frequency. Conversely, to obtain the number of SNPs required to produce the appropriate FRR, we used a bisection-method search.
